# Supplementary material for: The Uncomfortable Truth: Open Thoracotomy versus Minimally Invasive Surgery in Lung Cancer: A Systematic Review and Meta-Analysis
Source: MDPI journal article supplement (doi:10.3390/cancers15092630), 2023-05-05

**Figure S1.** Forest plot of comparing age in study population according to surgical approach.

### Age

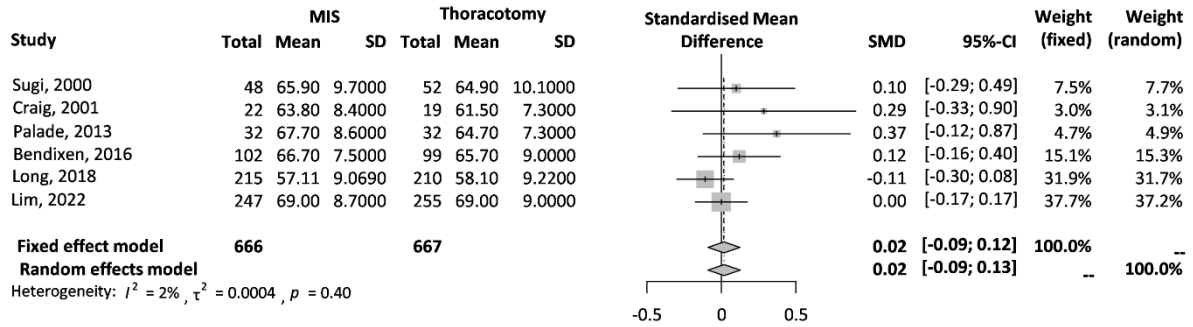

MIS, minimally invasive surgery

**Figure S2.** Forest plot of comparing male proportion in study population according to surgical approach.

### Male

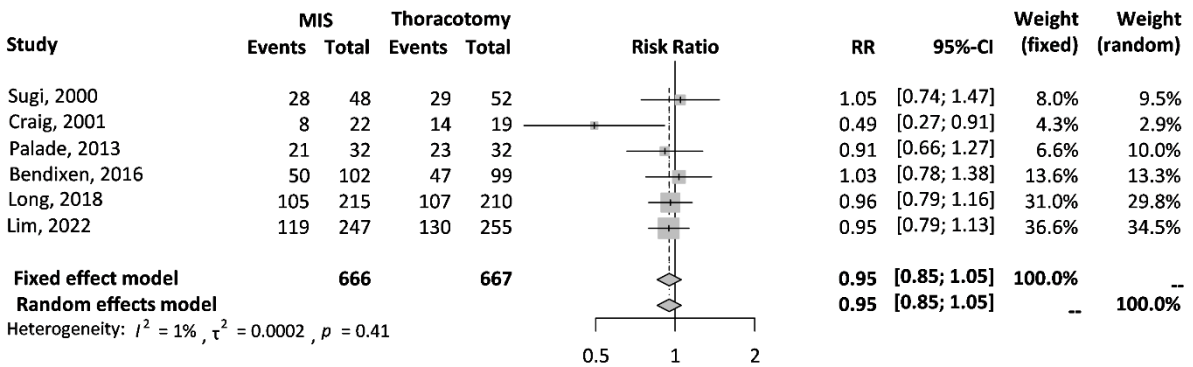

MIS, minimally invasive surgery

**Figure S3.** Forest plot of comparing adenocarcinoma proportion in study population according to surgical approach.

### Histology-Adenocarcinoma

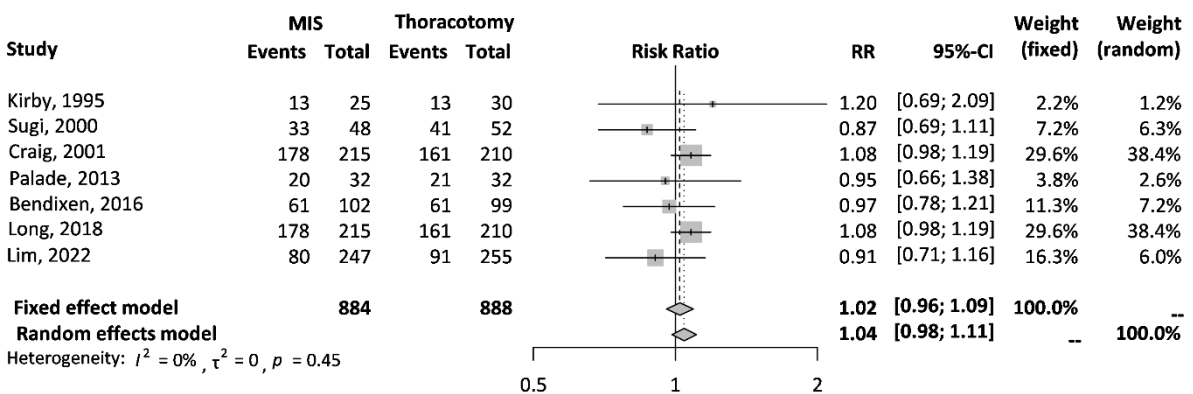

MIS, minimally invasive surgery

**Figure S4.** Forest plot of comparing tumor size in study population according to surgical approach.

# Tumor size (with available data)

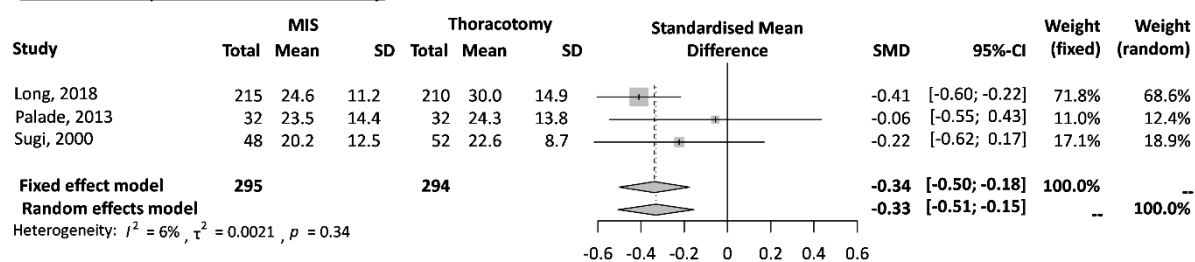

Figure S5. Forest plot of comparing proportion of patients with prolonged pain according to surgical approach.

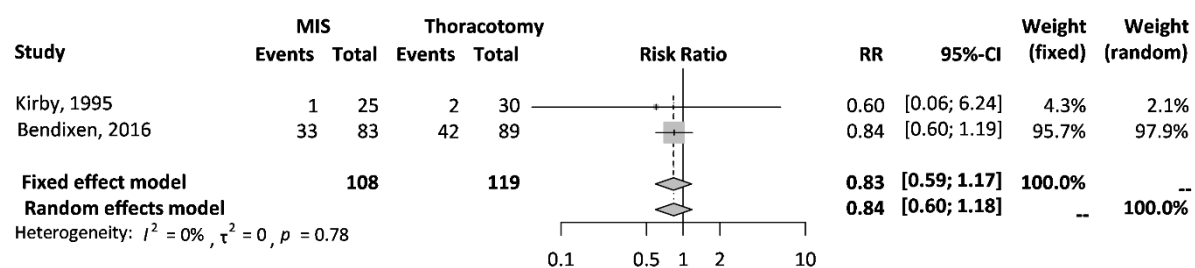

Supplement: s1 [file s1]
